# Supplementary material
Source: Research Square preprint supplement (doi:10.21203/rs.3.rs-9345057/v1)
Supplement: Supplementary file 1 [file 88fbaf5b4a3d810964a6085f.docx]

Table 9: Economic Potential Value of planting High Yielding and Drought Tolerant Soybean Varieties

| Variety | Total surplus (ha/season) | | Component-wise distribution (/ha/season) | | | | | |
| --- | --- | --- | --- | --- | --- | --- | --- | --- |
| standard | Dry spell scenario | Standard | | | Prolonged dry period | | |
|  | Net Economic Gain | Risk mitigation advantage |  | Net Economic Gain | Risk mitigation advantage |
| JS 93-05 | 7970 | 3553 |  | 7970 | 0 |  | 3553 | 0 |
| JS 95-60 | 12161 | 5926 |  | 12161 | 0 |  | 5926 | 0 |
| NRC-7 | 62785 | 56227 |  | 10046 | 52112 |  | 8771 | 47456 |

Source: [95].
